# Supplementary material for: Nuciferine administration in C57BL/6J mice with gestational diabetes mellitus induced by a high-fat diet: the improvement of glycolipid disorders and intestinal dysbacteriosis
Source: Royal Society of Chemistry journal article supplement (doi:10.1039/d1fo02714j), 2021-01-01
Supplement: d1fo02714j1.pdf [file d1fo02714j1.pdf]

Figure S1

**A**

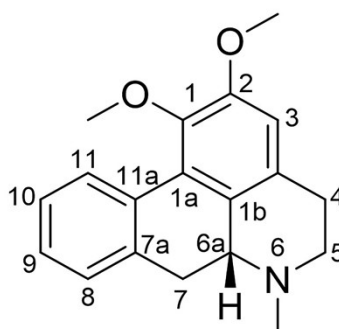

**B**

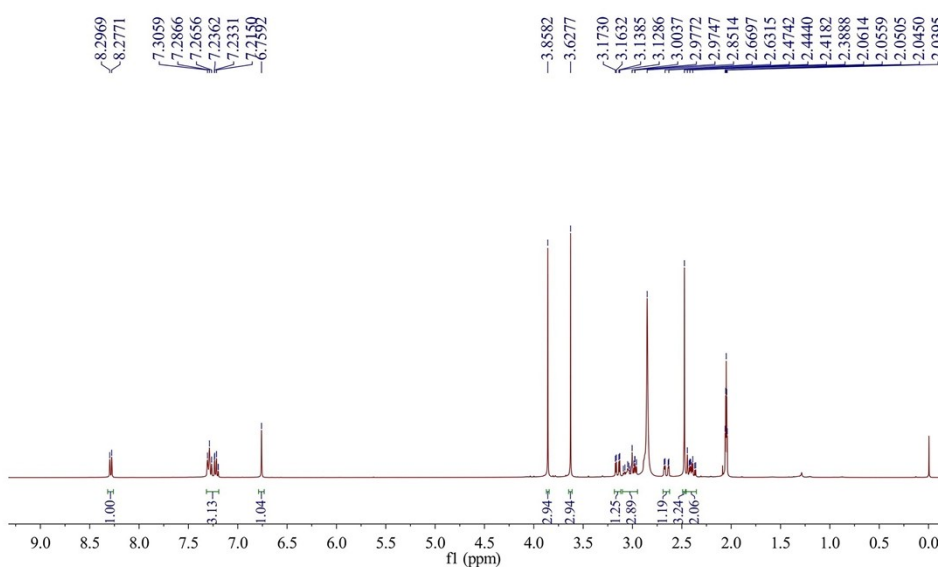

**C**

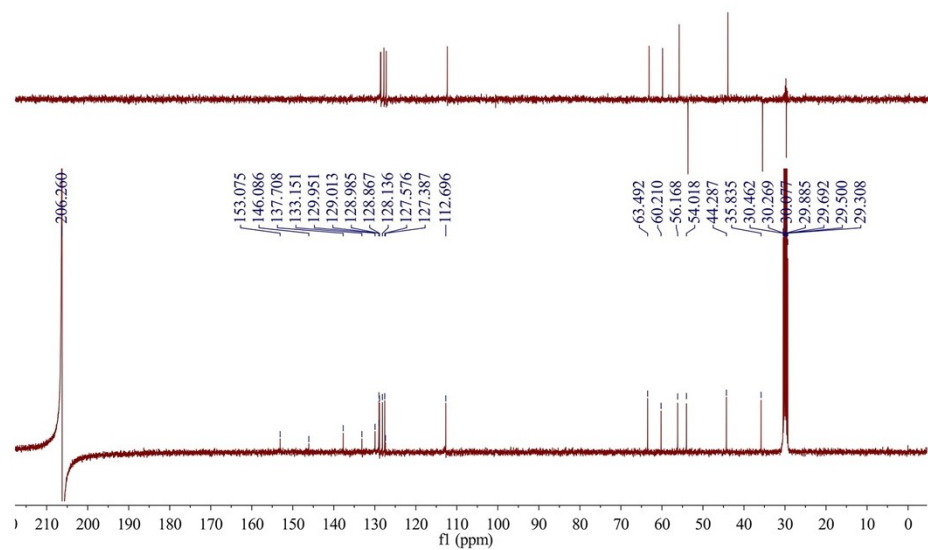

**Figure S1.** Structure identification of nuciferine. (A) Chemical structure of nuciferine; (B)  $^1\text{H-NMR}$  spectra of nuciferine,  $^1\text{H-NMR}$  (400 MHz,  $\text{CD}_3\text{COCD}_3$ )  $\delta_{\text{H}}$  8.29 (1H, d,  $J = 7.9$  Hz, H-11), 7.31-7.22 (3H, m, H-8, H-9, and H-10), 6.76 (1H, s, H-3), 3.86 (3H, s, 1-OCH<sub>3</sub>), 3.63 (3H, s, 2-OCH<sub>3</sub>), 3.15 (1H, dd,  $J = 13.8$  and 4.0 Hz, H-7a), 3.09-2.96 (3H, m, H-4a, H-5a, and H-7b), 2.65 (1H, dd,  $J = 13.8$  and 3.4 Hz, H-6a), 2.47-2.36 (2H, m, H-4b and H-5b); (C)  $^{13}\text{C-NMR}$  spectra of nuciferine,  $^{13}\text{C-NMR}$  (100 MHz,  $\text{CD}_3\text{COCD}_3$ )  $\delta_{\text{C}}$  153.1 (C, C-2), 146.1 (C, C-1), 137.7 (C, C-7a), 133.2 (C, C-11a), 130.0 (C, C-3a), 129.0 (C, C-1a), 129.0 (CH, C-11), 128.9 (CH, C-8), 128.1 (CH, C-10), 127.6 (CH, C-9), 127.4 (C, C-1b), 112.7 (CH, C-3), 63.5 (CH, C-6a), 60.2 (CH<sub>3</sub>, 1-OCH<sub>3</sub>), 56.2 (CH<sub>3</sub>, 2-OCH<sub>3</sub>), 54.0 (CH<sub>2</sub>, C-5), 44.3 (CH<sub>3</sub>, N-CH<sub>3</sub>), 35.8 (CH<sub>2</sub>, C-7), 29.3 (CH<sub>2</sub>, C-4).
