# Supplementary material for: Nuciferine administration in C57BL/6J mice with gestational diabetes mellitus induced by a high-fat diet: the improvement of glycolipid disorders and intestinal dysbacteriosis
Source: Royal Society of Chemistry journal article supplement (doi:10.1039/d1fo02714j), 2021-01-01
Supplement: d1fo02714j2.pdf [file d1fo02714j2.pdf]

**Figure S2**

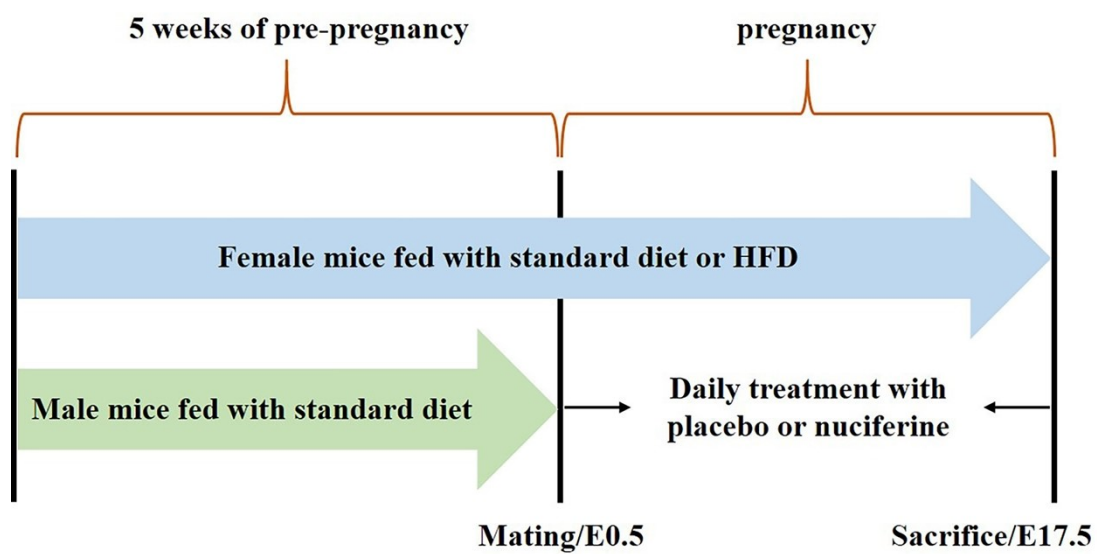

**Figure S2.** Diagram of nuciferine treatment in an HFD-induced GDM mice model. Female mice were fed with standard diet or HFD during the experimental period, and male mice with the same age were fed with standard diet until mating. After feeding with the individual diet for 5 weeks, female mice were housed with male mice in a same cage at the ratio of 2: 1, and the presence of vaginal plug was an indicative of successful mating, which was considered as 0.5-day of pregnancy and recorded as E0.5. During pregnancy, female mice fed with standard diet received oral administration of 0.5% CMC-Na as placebo once a day, and female mice fed with HFD received oral administration of placebo or 30 mg/kg/day nuciferine dispersed well in 0.5% CMC-Na solution. At the E17.5, pregnant mice were sacrificed.
