# Supplementary material for: Nuciferine administration in C57BL/6J mice with gestational diabetes mellitus induced by a high-fat diet: the improvement of glycolipid disorders and intestinal dysbacteriosis
Source: Royal Society of Chemistry journal article supplement (doi:10.1039/d1fo02714j), 2021-01-01
Supplement: d1fo02714j3.pdf [file d1fo02714j3.pdf]

**Table S1.** Primers used for real-time PCR

|                | Forward primer                  | Reverse primer                 |
|----------------|---------------------------------|--------------------------------|
| ACC1           | 5' GCTAACCCAACTCAGCAAGACC 3'    | 5' CACCTGGTTGCTGTGGTAAAAA 3'   |
| FASN           | 5' TAGAACCTCCAGTCGTGAAACCA 3'   | 5' ATCTCATCTATCTTGCCCTCCTTG 3' |
| PPAR- $\alpha$ | 5' GAGAATCCACGAAGCCTACCTG 3'    | 5' GACCTCTGCCTCTTTGTCTTCG 3'   |
| ACOX1          | 5' CTGAAATCAAGAGAAGCGAGCC 3'    | 5' CAGGTAGTAAAAGCCTTCAGCCC 3'  |
| SREBP-1c       | 5' CATGGACGAGCTGGCCTTC 3'       | 5' ACTGTCTTGGTTGTTGATGAGC 3'   |
| GS             | 5' GGAGGACATTCTGGACAGAGAGAAC 3' | 5' GAAATCTGAGTCCATGCCGTCT 3'   |
| G-6-Pase       | 5' ACACCGACTACTACAGCAACAGC 3'   | 5' AATCCCAACCACAAGATGACG 3'    |
| PEPCK          | 5' GCAAGACAGTCATCATCACCCA 3'    | 5' GGCGAGTCTGTCAGTTCAATACC 3'  |
| GAPDH          | 5' CCTCGTCCCGTAGACAAAATG 3'     | 5' TGAGGTCAATGAAGGGGTCGT 3'    |

ACC1, acetyl-CoA carboxylase 1; FASN, fatty acid synthase; PPAR- $\alpha$ , peroxisome proliferator-activated receptor alpha; ACOX1, peroxisomal acyl-coenzyme A oxidase 1; SREBP-1c, sterol regulatory element-binding protein 1c; GS, glycogen synthase; G-6-Pase, glucose-6-phosphatase; PEPCK, phosphoenolpyruvate carboxykinase; GAPDH, glyceraldehyde-3-phosphate dehydrogenase.
